# Equal, equitable or exacerbating inequalities? Patterns and predictors of social prescribing referrals in 160,128 UK patients

Feifei Bu, PhD<sup>1</sup>; Daniel Hayes, PhD<sup>1</sup>; Alexandra Burton, PhD<sup>1</sup>; Daisy Fancourt, PhD<sup>1\*</sup>

<sup>1</sup> Department of Behavioural Science and Health, Institute of Epidemiology & Health Care, University College London

\* Correspondence to: Prof Daisy Fancourt, 1-19 Torrington Place, Department of Behavioural Science and Health, University College London WC1E 7HB, UK [d.fancourt@ucl.ac.uk](mailto:d.fancourt@ucl.ac.uk)

Classification: social sciences, social sciences

Keywords: social prescribing, inequalities, social determinants

## Abstract

Background: Social prescribing (SP) is growing rapidly across the world as a way to tackle social determinants of health. However, whom it is reaching and how effectively it is being implemented remains unclear.

Methods: This study undertook the first analyses of a large database of administrative data from over 160,000 individuals referred to SP across the UK. Data were analysed using descriptive analyses and regression modelling, including logistic regression for binary outcomes and negative binomial regression for count variables.

Findings: 72-85% of referrals for SP were from medical routes (primary or secondary health care). While these referrals demonstrate equality in reaching across socio-demographic groups, individuals from more deprived areas, younger adults, men, and ethnic minority groups were reached more equitably via non-medical referral routes. Despite 90% of referrals leading to contact with a link worker, only 38% resulted in any intervention being received. A shortage of provision of community activities - especially ones relevant to mental health, practical support, and social relationships - was evident. There was also substantial heterogeneity in how SP is being implemented across UK nations.

Interpretation: Non-medical referral routes could play an important role in addressing inequality in accessing social prescribing, therefore should be prioritised. Additionally, more financial and infrastructural resource and strategic planning are needed to address low intervention rates. Further investment into large-scale data platforms and staff training are needed to continue monitoring the development and distribution of social prescribing.

## Significance statement

Social prescribing - linking patients with non-medical forms of support in local communities - has been proposed as a way to address social determinants of health and improve health and wellbeing outcomes, leading to increasing implementation of programmes globally. But reviews into the use of SP suggest that referrals are not equitable and could even be disproportionately reaching individuals who are *less* disadvantaged. Analysing data from the most widely adopted digital SP platform in the UK, we show that medical referral routes (e.g. via GPs) reach people across all demographic groups equally, even though some demographic groups have greater health needs. But non-medical referral routes (e.g. through social care or communities) are helping to address inequalities and provide more equitable access.

## 12 Introduction

13 Social determinants of health (SDOH), including income, education, employment, housing, childhood  
14 experience, social support, have long been demonstrated to play an important role in determining health  
15 outcomes.<sup>1-3</sup> SDOH are estimated to account for 47% of health outcomes compared to just the 16%  
16 attributed to clinical care.<sup>1</sup> Social prescribing (SP) is proposed as a way to address SDOH and improve  
17 health and wellbeing outcomes.<sup>4</sup> Although SP has been advocated and practiced since 1980s, not until the  
18 last decade has it been widely recognised and implemented across the UK.<sup>5</sup> SP involves linking patients  
19 with non-medical forms of support in their local communities, such as physical activity, social support,  
20 mental health support, financial advice, housing support, and so forth.<sup>6</sup> The predominant SP model  
21 involves a healthcare professional referring patients on to a Link Worker, Community Connector,  
22 Community Navigator, or Health Trainer, who then works with the patient to develop a personalised care  
23 plan which connects them to community support and interventions.<sup>4</sup>

24 Evidence of mixed quality suggests that SP helps with a wide range of problems, including supporting  
25 mental health, wellbeing and health behaviours.<sup>7-10</sup> Preliminary evidence also suggests that SP either  
26 reduces healthcare demand and costs or moves healthcare demand to primary care services rather than  
27 more expensive tertiary care, and demonstrates a favourable return on investment.<sup>11</sup> Given its potential,  
28 NHS England has committed to tripling the number Link Workers by 2036/37.<sup>12</sup> However, despite the  
29 promises of SP, national evaluations remain scant. Instead, evidence on SP is often limited to small scale,  
30 local evaluations and homogenous patient groups.<sup>13-16</sup> Reviews into the use of SP suggest that referrals are  
31 not equitable, with those who are under 16, male, and those from non-white backgrounds being less likely  
32 to be offered SP.<sup>14</sup> There are even concerns that SP is not effective for addressing social inequalities – it  
33 cannot address upstream determinants of inequalities and could even be provided disproportionately  
34 more to individuals who are less disadvantaged.<sup>17-19</sup>

35 To try and better understand the national picture of SP, studies have begun to explore patterns of SP in  
36 electronic patient health records. For example, the SP Observatory has analysed administrative data on SP  
37 referrals from over 1800 GP practices in England, showing a rapid increase in referrals since 2020,  
38 especially during the COVID-19 pandemic.<sup>20</sup> Significant variation in rates of referrals across England has  
39 been identified, but with no substantial variation in referral rates by gender, ethnicity or neighbourhood  
40 deprivation.<sup>20</sup> Whilst findings such as this are of great importance, there are limitations. First, SP is not  
41 limited to GP referrals, with referrals also made in secondary care,<sup>21</sup> through voluntary and community  
42 sector organisations (VCSOs), via self-referral and more.<sup>22</sup> Currently, the demographics of SP referrals via  
43 non-medical pathways are largely unknown. Moreover, given that certain demographics, particularly  
44 people from ethnic minority backgrounds, are less likely to report positive experiences accessing GP  
45 services<sup>23</sup> and young people report not wanting to access GP support for their mental health,<sup>24</sup> it is  
46 important to establish if such groups are accessing SP via these alternative pathways. Second, there is only  
47 very limited information available in SNOMED codes used by GP practices, and these can include  
48 inconsistent coding, alongside poor recording of wider determinants of health leading to conclusions that  
49 they cannot be used to assess equity of referrals.<sup>20,25</sup> Indeed, little is known about if SP referrals lead to any  
50 contact with link workers and actual interventions, why people are referred to SP, what interventions are  
51 prescribed, and what aspects lead to a successful, engaged SP referral. Third, national SP research has  
52 largely relied on data in England. How SP is implemented in other devolved countries in the UK, is also  
53 unknown.

34 The growth in cloud-based referral-management platforms that allow multi-stakeholder data input about  
35 SP pathways and integrate with primary care, secondary care and social care systems, is presenting new  
36 opportunities for understanding how SP is working and who it is reaching.<sup>26</sup> However, data from these  
37 platforms have not been properly capitalised on. Therefore, the present study was initiated to address the  
38 knowledge gaps outlined above by using administrative data from one such SP platform: Access Elemental.  
39 We aimed to explore demographic characteristics, referral reasons, number of contacts, and interventions

30 being provided through SP pathways, and also whether these rates differed across medical and non-  
31 medical referral pathways and whether there were any early indications of differences in individual  
32 country SP models. Overall, these analyses aimed to provide a more comprehensive understanding of SP  
33 roll-out across the UK, having important implications for future policy, service, and workforce planning.

## 34 Results

### 35 SP cases

36 We used data from the administrative records of Access Elemental,<sup>27</sup> the most widely adopted digital SP  
37 platform in the UK to date. Elemental serves a population of over 20 million people across England,  
38 Scotland, Wales and Northern Ireland with good geographical coverage and has recorded over 2.1 million  
39 contacts between patients and SP teams, including over 438,000 referrals to community-based  
40 programmes, services, and interventions to date. Elemental data are available since January 2017, and this  
41 study used data up until November 2022, resulting in 201,037 SP cases from 169,818 unique individuals.  
42 94.3% of individuals provided valid postcodes (N=160,128), allowing for data linkage with publicly available  
43 geographic information (see Figure S1). Figure S2 shows the distribution of SP service users across local  
44 authorities in the UK. Figure S3 shows the number of SP service users over time in the UK and across  
45 different countries. Most cases (88%) occurred between 2020-2022 in the UK, after the formal launch of  
46 the scheme as part of the NHS England Long-Term Plan.<sup>29</sup>

37

### 38 Demographic profiles

39 Among 160,128 unique individuals referred to SP, 141,011 people (88.1%) lived in England, 9,613 (6.0%) in  
40 Wales, 2,374 (1.5%) in Scotland and 7,130 (4.5%) in Northern Ireland. This proportion was largely similar to  
41 national statistics, with a slight overrepresentation of people from England (Table S3 in the Supplement).

42 There was an overrepresentation of females being referred to SP in all countries, especially in Northern  
43 Ireland where 72.8% were females (Figure 1a, Table S4). Most service users (78.0%-87.2%) were aged 18 to  
44 69 in each country (Figure 1b). However, Wales (5.2%) and Northern Ireland (11.5%) had a higher  
45 percentage of people aged under 18. Scotland had a higher percentage of people in their 60s (32.7%). Only  
46 5.6% of SP service users lived in rural areas in England, much lower than the rural population estimate of  
47 17.1% (Figure 1c). However, this percentage was substantially higher in Wales (24.1% vs 20% rural  
48 population), Scotland (27.2% vs 17% rural population) and Northern Ireland (35.5% vs 36% rural  
49 population). SP service users were more likely to live in deprived areas (Figure 1d). In the general  
50 population, roughly 10% of people living in each deprivation decile in each country. In England, 45.9% of  
51 people referred to SP lived in the top three most deprived areas, 45.8% in Wales and 63.8% in Northern  
52 Ireland. However, in Scotland, service users were more evenly distributed across deprivation deciles,  
53 except for the top two least deprived deciles.

24

[Figure 1 here]

### 25 Referral routes

26 SP referrals can be either medical (from GP practices, but also secondary care staff such as occupational  
27 therapists, physiotherapists, discharge teams and hospital based social workers) or non-medical (from  
28 educational establishments, local authorities, VSCOs, housing associations, self-referral, and so forth.)

29 Most SP cases were referred from medical routes in England (85.3%), Wales (72.3%) and Scotland (84.8%).  
30 The percentage was much lower in Northern Ireland (22.8%), possibly due to a high missing rate (82.9%,  
31 see Table S2). Table S5 in the Supplement compares socio-demographic profiles of people referred from  
32 medical and non-medical routes. Notably, SP service users referred via medical routes were more evenly  
33 distributed across ethnic groups, and deprivation deciles; whereas those from non-medical routes were  
34 more balanced across gender and urbanicity groups.

35 All socio-demographic factors were related to referral routes, but estimated associations differed across  
36 countries (Figure 2 & Table S6). Key country differences were summarised in Table 1.

37 [Figure 2 here]

38 [Table 1 here]

### 39 Referral reasons

40 The most common referral reasons were related to mental health and wellbeing (33.5%), followed by  
41 practical support (26.1%) and social relationship (22.5%); whereas employment or education/skills (10.3%)  
42 and physical health (16.4%) related reasons were relatively less common (Figure 3a). Most SP cases (69.7%)  
43 reported reasons from a single domain only. About a third reported reasons from more than one domain.  
44 As shown in Figure 3b, 60.3% of cases referred for mental health reasons also had reasons from other  
45 domains, 52.3% practical support, 63.4% social support and 50.7% physical health. Figure S5 shows  
46 differences across countries. Physical health was among the most common reason in Wales, Scotland and  
47 Northern Ireland. Life-style related reasons were also common in Scotland and Northern Ireland.

48 [Figure 3 here]

### 49 Contacts with link workers

50 Approximately 90% of SP cases had at least one contact with a link worker. Among cases without any  
51 recorded contact with a link worker, 53.1% were active cases who might yet to be contacted. On average,  
52 there were 4.2 contacts per case (SD=6.8, median=2). Among all the contacts, 11.5% were unsuccessful,  
53 31.6% having reached clients with specific outcomes (e.g. appointment arranged, referral made,  
54 signposted, declined service), and 56.9% unclear (e.g. contact made, email/message left). Most of contacts  
55 (81.2%) were made virtually, only 6.3% face-to-face, and another 12.6% unspecified. The contacts typically  
56 lasted for 0-15 minutes (59.4%), but some were longer (Figure S6). People referred from a medical route  
57 had a higher number of contacts across all countries (Figure S7 and Table S7). Gender, age, urbanity and  
58 area deprivation were also associated with the number of contacts, but some heterogeneities were  
59 founded across countries (Table 1).

### 50 Interventions

51 Among 201,037 cases, 38.3% (n=76,992) had at least one intervention prescribed. Intervention  
52 prescription rates were 35.4% in England, 33.0% in Wales, but much higher in Scotland (51.9%) and  
53 Northern Ireland (74.9%). Referral routes, number of contacts, referral reasons, age, urbanity were  
54 associated with the odds of having an intervention prescribed (Figure S8 and Table S8). But there were  
55 notably differences across countries (Table 1). For example, urban residents were more likely to have an  
56 intervention in England, but less likely in Wales and Scotland than rural residents.

57 For SP cases with at least one intervention (n=76,971), there were 165,595 prescribed interventions (2.2  
58 per case). Most of these interventions (91.7%) were recorded as free to access. Only 6.3% had out-of-  
59 pocket costs and another 1.9% were subsidised (Table S9). England and Wales were similar in that over 95%  
70 interventions were free. But only 50.3% interventions were free in Scotland and 78.7% in Northern Ireland  
71 (Table S9).

72 Most prescribed interventions (82.9%) had information on service domains, with 62.9% of these  
73 interventions falling under one service domain and 37.1% with more than one domain. As shown in Figure  
74 4a, around 43.8% SP cases had an intervention related to mental health and wellbeing, followed by social  
75 relationships (36.3%), lifestyle (28.7%), employment, education and skills (25.4%), practical support  
76 (24.6%), physical health and wellbeing (19.0%) and other support (12.7%). Linking back to referral reasons,  
77 Figure 4b shows the percentage of cases with an intervention prescribed by referral reasons in the UK. 69.3%  
78 of cases who were referred due to mental health reasons had no intervention, 67.6% for physical health,  
79 71.0% for social relationship, 65.9% for lifestyle, 70.5% for practical reasons, 72.8% for other reasons. The  
80 percentage of cases with no intervention was much lower for those referred for employment related

31 reasons (37.1%). Among cases who did have an intervention, those who were referred for lifestyle related  
32 reasons were more likely to have an intervention matched to these reasons (81.7%), followed by  
33 employment (76.1%), mental health (70.3%), practical support (60.5%) and social relationships (60.1%)  
34 reasons. Cases for physical health (32.7%) or other reasons (14.9%) were less likely to have a matched  
35 intervention, but the patterns differed across countries (Figure S9). For instance, 35.9% of cases who were  
36 referred due to lifestyle reasons had no intervention in Scotland, compared to 20.8% in Northern Ireland.  
37 Moreover, only 18.6% of cases with social reasons had no intervention in Northern Ireland.

38 [Figure 4 here]

## 39 Discussion

40 This study is the first UK-wide study on SP referrals in the UK, with fine details on service users' socio-  
41 demographic profiles, referral routes, reasons, contacts with link workers and actual interventions and  
42 their costs. While relying on data from just one data management system, it provides importance evidence  
43 to triangulate with previous research using GP records and smaller-scale evaluations by providing (i)  
44 simultaneous data on both medical and non-medical referral sources, allowing the first direct comparison  
45 of population characteristics, (ii) detail not just on whether a referral was made but the process by which  
46 the referral pathway was carried out, and (iii) a large sample size with data over several years. It  
47 systematically investigates on a large-scale the differences between medical and non-medical SP pathways  
48 across the UK and provides early data on differences across the devolved countries in the UK.  
49 Understanding of the status-quo of SP in the UK is crucial for identifying its future directions and  
50 supporting the roll-out of SP as a public health intervention around the world.

51 As expected, the medical pathway is the dominant referral route in the UK. The seemingly exception of  
52 Northern Ireland is likely to be driven by missing data. The medical pathway has its merits. Everyone in the  
53 UK is entitled to free healthcare, and most people (if not all) are registered with a GP. This may explain why  
54 SP service users were more evenly distributed across deprivation deciles and there was a higher  
55 percentage of people from ethnic minority background among people from the medical route compared to  
56 non-medical routes. This is consistent with previous findings of no ethnic or area deprivation difference in  
57 SP when focusing on primary care data.<sup>20</sup> In this vein, the medical pathway prevails in promoting equality.  
58 However, when it comes to actual service utilisation, there are notable socio-demographic differences. For  
59 example, there is less use of primary healthcare services among young people and men,<sup>30,31</sup> which may  
60 limit their chances of being referred to SP through primary care. In addition to *equality*, we need to  
61 consider *equity*. People from deprived areas generally have higher risks of health problems and more  
62 complex needs, potentially requiring extra support and resources to achieve an equal outcome.<sup>32,33</sup> Our  
63 findings suggest that the non-medical pathway complements the medical pathway by reaching the  
64 underrepresented in healthcare and those who are in greater need of support (e.g. those from more  
65 deprived areas). The two pathways should work hand in hand to maximise the overall impact and  
66 efficiency of SP.

67 Referral, regardless of route, is only an early step in the lifecycle of an SP case. A key question is whether a  
68 referral leads to any intervention. Our analyses revealed that 9 in 10 referred SP cases had at least one  
69 contact with a link worker, showing a successful initial transition. However, only 38.3% of cases were  
70 subsequently referred to an intervention. Non-intervention could happen as a result of not being able to  
71 reach the client, referral being declined, or a lack of appropriate resources or suitable interventions in the  
72 local community (especially considering that over 90% of prescribed interventions are free of charge so  
73 depend on such provision being available). This free community provision is strong for some domains such  
74 as employment support which has long been a priority in the UK.<sup>34</sup> Similarly, people living in urban areas  
75 are more likely to be referred to an intervention than rural residents, likely due to provision. But there are  
76 clear provision gaps in other domains. Although mental health, practical support and social relationship are  
77 the most common referral reasons, the percentage of people having a matched intervention for each of  
78 these reasons is only around 20%, compared to 47.9% for employment. Therefore, there is urgent work

29 that is needed either building further community infrastructure in domains outside employment to enable  
30 free services to be available, or providing further ringfenced funding for link workers to utilise in under-  
31 resourced intervention domains.

32 Another finding that stands out is the heterogeneity of SP across countries in the UK. Socio-demographic  
33 profiles of SP service users across countries. For example, in Wales and Northern Ireland, there are higher  
34 percentages of children and young people under 18, as well as people from the most deprived decile being  
35 referred to SP. This could reflect different approaches being adopted with respect to equality and equity in  
36 different countries, which is in line with our finding of differential associations of socio-demographic  
37 factors with referral routes, contacts with link workers and prescribed interventions across countries.  
38 Differences in service user compositions could also, to some extent, explain the country differences in the  
39 distribution of referral reasons. For example, over 50% of SP cases are referred due to practical reasons in  
40 Wales, and lifestyle is the most common referral reason in Northern Ireland (one of the least common  
41 reasons in England and Wales). Intervention rates are notably higher in Scotland and Northern Ireland,  
42 which could be related to reasons of referral and the availability of required services. Notably, England and  
43 Wales have a much lower percentage of interventions that are costed or subsidised than Scotland and  
44 Northern Ireland, providing further evidence that relying on free services due to a lack of funding could be  
45 a major obstacle to an efficient and effective service.

46 However, the country differences should be interpreted with caution as we are unable to assess the  
47 representativeness of the data. This is particularly concerning for Wales, Scotland and Northern Ireland  
48 where the sample sizes are small. Although Access Elemental is the largest digital platform for SP across  
49 the UK, we cannot rule out the possibilities that the country differences might be driven by different  
50 clienteles of the Access Elemental in these countries compared to England. Indeed, despite being used  
51 across a diverse range of places in the UK, Elemental has low coverage in Scotland (18%) and is not used in  
52 some areas e.g. Greater Glasgow and Clyde in Scotland, which have high levels of deprivation, accounting  
53 for the much lower representation we had in our dataset of people from the lowest two deciles of  
54 deprivation in Scotland. Given that all primary care data in the UK is non-representative given the multiple  
55 different data platforms in use both amongst GPs and for more specialist purposes like SP, this challenge is  
56 not easily solved, but further work cross-validating the findings presented here is encouraged if we are to  
57 fully understand cross-country differences in SP. In these analyses, although ethnicity is recorded in the  
58 data, the fact that it is 'optional' for data input means it is missing for most people, so we were unable to  
59 examine any SP differences related to ethnicity. Additionally, there is limited information on people's  
60 medical conditions which may influence the SP services that they receive. Continued efforts are needed to  
61 improve data quality and accessibility for a better understanding of SP implementation and its impacts.

62 Overall, this analysis shows that although the medical pathway in SP is dominant across the UK, it has a  
63 number of challenges associated, including that it does not manage to reach certain demographic groups  
64 such as young people, men, and people from more deprived areas as effectively. Consequently, there is a  
65 clear need for non-medical referral routes to be prioritised in the policy and delivery planning and funding  
66 of future SP in the UK. Although SP is an individual-focused intervention that does not address the  
67 structural factors that may have given rise to those inequalities in the first place, results from non-medical  
68 referrals suggest SP could provide additional support to individuals experiencing inequalities.<sup>35,36</sup>  
69 Additionally, despite a high number of SP referrals taking place, only a third are leading to an intervention  
70 after link worker consultations, with rates of interventions being particularly low on medical referral  
71 pathways and certain types of interventions (such as those for physical health) being very limited.  
72 Challenges in funding for community resources may be key here, with most financial resource for SP  
73 currently going to the pathway and affiliated staff rather than community resources. Additional financial  
74 resource for certain intervention domains for which there is not suitable free provision could help to  
75 readdress this balance. Third, given our findings of heterogeneity in how SP is being delivered, for whom,  
76 across England and devolved nations, specific strategies for the development of SP that meet the differing  
77 health and social needs in the different countries are recommended moving forwards. Finally, in order to

78 be able to continue monitoring the development and distribution of SP in the UK, further investment into  
79 large-scale data platforms such as Access Elemental and staff training in good quality data capture is vital.

## 30 Materials and methods

### 31 Data

32 Data were administrative records obtained from Access Elemental,<sup>27</sup> a digital SP platform used by health  
33 and social care professionals, community development workers and other service providers to keep track  
34 of SP activities and their impact from the point of referral. Elemental is the most widely adopted SP  
35 platform in the UK to date. It serves a population of over 20 million people across England, Scotland, Wales  
36 and Northern Ireland, and is used by over 37,740 health and care professionals and 4,405 social prescribers.  
37 To date, Elemental has recorded over 2.1 million contacts between patients and SP teams, including over  
38 438,000 referrals to community-based programmes, services, and interventions. While Elemental does not  
39 comprise a random sample of sites or patients in the UK, it does have good geographical coverage in  
40 England (45% of Integrated Care Boards), Wales (57% of Welsh University Health Boards) and Northern  
41 Ireland (80% of Health and Social Care Trusts), alongside smaller representation in Scotland (13% of  
42 Scottish Health and Social Care Partnerships). Further, due to the existence of multiple IT systems in  
43 primary care in the UK, it is typical for research involving primary care to only involve a proportion of the  
44 whole population.<sup>28</sup>

### 35 Measurement

36 Referrals sources were used as binary medical vs non-medical referrals. Referral reasons were coded in  
37 600+ categories and we grouped them into seven domains: 1) mental health and wellbeing, 2) physical  
38 health and wellbeing, 3) social relationships (e.g. loneliness and social isolation), 4) life-style (e.g. exercise,  
39 diet, drinking, smoking), 5) employment, education and skills, 6) practical support (e.g. housing, finance,  
40 legal), 7) other reasons (see Table S1 in the Supplement). The grouping was done by two of the authors  
41 independently and any disagreement was discussed and resolved by consensus.

42 Once people were referred to SP, they were connected to a SP link worker or a professional in a similar  
43 role (see Figure S4). We were interested in how many contacts with a link worker were made related to  
44 each SP case, referred as the number of contacts.

45 Contacts with link workers might or might not lead to individuals being connected with suitable community  
46 resources, referred as interventions in the present study. The intervention variable concerns if any  
47 prescription was issued by the link worker and what activities it entailed, without addressing service  
48 attendance or engagement. To be consistent with referral reasons, interventions (400+ categories) were  
49 also grouped into seven domains (Table S1): 1) mental health and wellbeing, 2) physical health and  
50 wellbeing, 3) social relationships, 4) lifestyle, 5) employment, education and skills, 6) practical support, 7)  
51 other support.

52 Socio-demographic covariates included gender (female, male, other), age (0-17, 18-29, 30-39, 40-49, 50-59,  
53 60-69, 70-79, 80+), urbanicity (urban, rural) and index of multiple deprivation (deciles: 1-most deprived to  
54 10-least deprived). Both urbanicity and area of deprivation were derived via postcode linkage to urban  
55 rural classification and index of multiple deprivation at Lower Layer Super Output Area (LSOA) in each  
56 country. Ethnicity was also available, but excluded from most analysis due to a high missing rate (>83%).

### 17 Statistical analysis

18 Descriptive analyses were undertaken to compare the socio-demographic profiles of people referred to SP  
19 services across UK countries, the percentages of different referral reasons, types of interventions received,  
20 and to what extent interventions matched to referral reasons. Regression analyses were conducted to  
21 assess variables that were associated with SP services stratified by country, excluding Northern Ireland due  
22 to a large proportion of missing data (82.9%) on referral route (Table S2). Referral route and interventions  
23 received were analysed using logistic regression models. The number of contacts with link workers was

24 modelled using negative binomial regression to account for over-dispersion. All models controlled for  
25 socio-demographic covariates. A small percentage of people had more than one SP case (<14%), so the  
26 most recent record was used in regression analyses. Missing data were excluded in descriptive analyses  
27 but imputed in regression models by using multiple imputation with chained equations, including all  
28 covariates (m=30). All analyses were conducted in Stata V18.

## 29 Acknowledgements and funding sources

30 This work was supported by the Prudence Trust INSPYRE grant [PT-0040], the MRC [MR/Y01068X/1], and  
31 the Nuffield Foundation Oliver Bird Fund and Versus Arthritis OBF/FR-000023818. The funders had no role  
32 in study design, data collection and analysis, decision to publish, or preparation of the manuscript. We  
33 thank Access Elemental for granting us the data access.

34

## 35 References

36

- 37 1 Hood CM, Gennuso KP, Swain GR, Catlin BB. County Health Rankings: Relationships Between Determinant  
38 Factors and Health Outcomes. *Am J Prev Med* 2016; **50**: 129–135.
- 39 2 Braveman P, Egerter S, Williams DR. The Social Determinants of Health: Coming of Age.  
40 <https://doi.org/10.1146/annurev-publhealth-031210-101218> 2011; **32**: 381–398.
- 41 3 Benach J, Friel S, Houweling T, Labonte R, Muntaner C, Schrecker T *et al*. A conceptual framework for action  
42 on the social determinants of health. 2010.
- 43 4 Drinkwater C, Wildman J, Moffatt S. Social prescribing. *BMJ* 2019; **364**. doi:10.1136/BMJ.L1285.
- 44 5 Morse DF, Sandhu S, Mulligan K, Tierney S, Polley M, Giurca BC *et al*. Global developments in social  
45 prescribing. *BMJ Glob Health* 2022; **7**: e008524.
- 46 6 Muhl C, Mulligan K, Bayoumi I, Ashcroft R, Godfrey C. Establishing internationally accepted conceptual and  
47 operational definitions of social prescribing through expert consensus: a Delphi study. *BMJ Open* 2023; **13**:  
48 e070184.
- 49 7 Bickerdike L, Booth A, Wilson PM, Farley K, Wright K. Social prescribing: less rhetoric and more reality. A  
50 systematic review of the evidence. *BMJ Open* 2017; **7**: e013384.
- 51 8 Chatterjee HJ, Camic PM, Lockyer B, Thomson LJM. Non-clinical community interventions: a systematised  
52 review of social prescribing schemes. <https://doi.org/10.1080/1753301520171334002> 2017; **10**: 97–123.
- 53 9 Howarth M, Brettle A, Hardman M, Maden M. What is the evidence for the impact of gardens and gardening  
54 on health and well-being: a scoping review and evidence-based logic model to guide healthcare strategy  
55 decision making on the use of gardening approaches as a social prescription. *BMJ Open* 2020; **10**: e036923.
- 56 10 Nguyen PY, Astell-Burt T, Rahimi-Ardabili H, Feng X. Effect of nature prescriptions on cardiometabolic and  
57 mental health, and physical activity: a systematic review. *Lancet Planet Health* 2023; **7**: e313–e328.
- 58 11 Kimberlee R, Bertotti M, Dayson C, Asthana S, Polley M, Burns L *et al*. The economic impact of social  
59 prescribing. London, 2022[https://socialprescribingacademy.org.uk/media/carfrp2e/evidence-review-](https://socialprescribingacademy.org.uk/media/carfrp2e/evidence-review-economic-impact.pdf)  
60 [economic-impact.pdf](https://socialprescribingacademy.org.uk/media/carfrp2e/evidence-review-economic-impact.pdf) (accessed 18 Jul2023).
- 51 12 NHS England. NHS Long Term Workforce Plan. 2023[https://www.england.nhs.uk/long-read/accessible-nhs-](https://www.england.nhs.uk/long-read/accessible-nhs-long-term-workforce-plan/#:~:text=This%20Plan%20sets%20out%20modelling,over%20the%20next%20two%20years.)  
52 [long-term-workforce-](https://www.england.nhs.uk/long-read/accessible-nhs-long-term-workforce-plan/#:~:text=This%20Plan%20sets%20out%20modelling,over%20the%20next%20two%20years.)  
53 [plan/#:~:text=This%20Plan%20sets%20out%20modelling,over%20the%20next%20two%20years.](https://www.england.nhs.uk/long-read/accessible-nhs-long-term-workforce-plan/#:~:text=This%20Plan%20sets%20out%20modelling,over%20the%20next%20two%20years.) (accessed 18  
54 Jul2023).
- 55 13 Elliott M, Davies M, Davies J, Wallace C. Exploring how and why social prescribing evaluations work: a realist  
56 review. *BMJ Open* 2022; **12**: e057009.



- 57 14 Cartwright L, Burns L, Akinyemi O, Carder-Gilbert H, Tierney S, Elston J *et al.* Who is and isn't being referred to  
58 social prescribing? London, 2022.
- 59 15 Mercer SW, Fitzpatrick B, Grant L, Chng NR, McConnachie A, Bakhshi A *et al.* Effectiveness of Community-  
60 Links Practitioners in Areas of High Socioeconomic Deprivation. *The Annals of Family Medicine* 2019; **17**: 518–  
61 525.
- 62 16 Kiely B, Croke A, O'Shea M, Boland F, O'Shea E, Connolly D *et al.* Effect of social prescribing link workers on  
63 health outcomes and costs for adults in primary care and community settings: a systematic review. *BMJ Open*  
64 2022; **12**: e062951.
- 65 17 Moscrop A. Social prescribing is no remedy for health inequalities. *BMJ* 2023; **381**. doi:10.1136/BMJ.P715.
- 66 18 NALW. URGENT: Act Now to Address Alarming Disparities in Social Prescribing Access!  
67 2023.<https://www.nalw.org.uk/urgent-act-now-to-address-alarming-disparities-in-social-prescribing-access/>  
68 (accessed 4 Mar2024).
- 69 19 Calderón-Larrañaga S, Milner Y, Clinch M, Greenhalgh T, Finer S. Tensions and opportunities in social  
70 prescribing. Developing a framework to facilitate its implementation and evaluation in primary care: a realist  
71 review. *BJGP Open* 2021; **5**: 1–13.
- 72 20 Jani A, Liyanage H, Okusi C, Sherlock J, De Lusignan S. Social prescribing observatory: A learning health system  
73 approach for using data to improve practice. 2020.
- 74 21 Family Action. Social Prescribing in Secondary Care Pilot Service Evaluation Report. 2018[www.family-  
75 action.org.uk/what-we-do](http://www.family-action.org.uk/what-we-do) (accessed 18 Jul2023).
- 76 22 Kimberlee R, Bertotti M, Dayson C, Elston J, Polley M, Burns L *et al.* (Sustainable) funding models for social  
77 prescribing. 2022.
- 78 23 Fisher R, Fraser C. Who gets in? What does the 2020 GP patient survey tell us about access to general practice?  
79 <https://www.health.org.uk/news-and-comment/charts-and-infographics/who-gets-in> (accessed 18 Jul2023).
- 80 24 Young Minds, The Children's Society. First port of call: The role of GPs in early support for young people's  
81 mental health. London, 2021.
- 82 25 Khan K, Al-Izzi R, Montasem A, Gordon C, Brown H, Goldthorpe J. The feasibility of identifying health  
83 inequalities in social prescribing referrals and declines using primary care patient records. *NIHR Open*  
84 *Research* 2023 3:1 2023; **3**: 1.
- 85 26 Elemental Software. Social Prescribing and the Digital Landscape . 2018.
- 86 27 Access Elemental social prescribing software. [https://www.theaccessgroup.com/en-gb/our-  
87 brands/elemental/](https://www.theaccessgroup.com/en-gb/our-brands/elemental/) (accessed 8 Aug2023).
- 88 28 Wolf A, Dedman D, Campbell J, Booth H, Lunn D, Chapman J *et al.* Data resource profile: Clinical Practice  
89 Research Datalink (CPRD) Aurum. *Int J Epidemiol* 2019; **48**: 1740.
- 90 29 NHS England. The NHS Long Term Plan. 2019[www.longtermplan.nhs.uk](http://www.longtermplan.nhs.uk) (accessed 7 Feb2024).
- 91 30 Mukhtar TK, Bankhead C, Stevens S, Perera R, Holt TA, Salisbury C *et al.* Factors associated with consultation  
92 rates in general practice in England, 2013–2014: a cross-sectional study. *The British Journal of General*  
93 *Practice* 2018; **68**: e370.
- 94 31 Wang Y, Hunt K, Nazareth I, Freemantle N, Petersen I. Do men consult less than women? An analysis of  
95 routinely collected UK general practice data. *BMJ Open* 2013; **3**: e003320.
- 96 32 Skapinakis P, Lewis G, Araya R, Jones K, Williams G. Mental health inequalities in Wales, UK: Multi-level  
97 investigation of the effect of area deprivation. *The British Journal of Psychiatry* 2005; **186**: 417–422.
- 98 33 Pearce JR, Richardson EA, Mitchell RJ, Shortt NK. Environmental justice and health: the implications of the  
99 socio-spatial distribution of multiple environmental deprivation for health inequalities in the United Kingdom.  
100 *Transactions of the Institute of British Geographers* 2010; **35**: 522–539.

- 11 34 Finn D. Jobcentres and the delivery of employment services and benefits. In: Millar J, Sainsbury R (eds).  
12 *Understanding social security*. Policy Press, 2018, pp 217–234.
- 13 35 Gibson K, Pollard TM, Moffatt S. Social prescribing and classed inequality: A journey of upward health  
14 mobility? *Soc Sci Med* 2021; **280**: 114037.
- 15 36 Moscrop A. Social prescribing is no remedy for health inequalities. *BMJ* 2023; **381**. doi:10.1136/BMJ.P715.
- 16

Table 1. Summary of key differences across countries from regression analyses

|                                                  | England                                                                                                                                                                                                                                                                                                                                                                                                                                                                                                                                                                                                                                                              | Wales                                                                                                                                                                                                                                                                                                                                                                                                                                                                                                                                                                                                                                | Scotland                                                                                                                                                                                                                                                                                                                                                                                                                                                                                                                                                          |
|--------------------------------------------------|----------------------------------------------------------------------------------------------------------------------------------------------------------------------------------------------------------------------------------------------------------------------------------------------------------------------------------------------------------------------------------------------------------------------------------------------------------------------------------------------------------------------------------------------------------------------------------------------------------------------------------------------------------------------|--------------------------------------------------------------------------------------------------------------------------------------------------------------------------------------------------------------------------------------------------------------------------------------------------------------------------------------------------------------------------------------------------------------------------------------------------------------------------------------------------------------------------------------------------------------------------------------------------------------------------------------|-------------------------------------------------------------------------------------------------------------------------------------------------------------------------------------------------------------------------------------------------------------------------------------------------------------------------------------------------------------------------------------------------------------------------------------------------------------------------------------------------------------------------------------------------------------------|
| Referral routes (Figure 2, Table S6)             | <ul style="list-style-type: none"> <li>• Males were less likely to be referred via medical routes.</li> <li>• People from older age groups (40+) had higher odds of being referred via medical routes (vs. aged 30-39).</li> <li>• Urban residents had 3.24 times higher odds of being referred via medical routes.</li> <li>• People from less deprived areas were more likely to be from medical routes.</li> </ul>                                                                                                                                                                                                                                                | <ul style="list-style-type: none"> <li>• Males were less likely to be referred via medical routes.</li> <li>• Children and young adults (0-29) were more likely to be referred via medical routes (vs. aged 30-39).</li> <li>• Urban residents had 1.63 times higher odds of being from medical routes.</li> <li>• People from less deprived areas were less likely to be from medical routes.</li> </ul>                                                                                                                                                                                                                            | <ul style="list-style-type: none"> <li>• No difference by gender.</li> <li>• Children under 18 and older adults in their 60s were less likely to be referred via medical routes (vs. aged 30-39).</li> <li>• No difference by urbanicity.</li> <li>• People from less deprived areas were less likely to be from medical routes.</li> </ul>                                                                                                                                                                                                                       |
| Contacts with link workers (Figure S7, Table S7) | <ul style="list-style-type: none"> <li>• Males had fewer contacts.</li> <li>• Urban residents had fewer contacts.</li> <li>• Older adults aged 60+ had fewer contacts.</li> <li>• People from less deprived areas had more contacts</li> </ul>                                                                                                                                                                                                                                                                                                                                                                                                                       | <ul style="list-style-type: none"> <li>• Males had fewer contacts.</li> <li>• Urban residents had fewer contacts.</li> <li>• Older adults aged 80+ had fewer contacts.</li> <li>• People from less deprived areas had more contacts, but no difference between the most and least deprived deciles</li> </ul>                                                                                                                                                                                                                                                                                                                        | <ul style="list-style-type: none"> <li>• Males had more contacts.</li> <li>• No difference by urbanicity.</li> <li>• Older adults in their 60s and those aged 80+ had more contacts.</li> <li>• People from less deprived areas had more contacts, but no difference between the most and least deprived deciles</li> </ul>                                                                                                                                                                                                                                       |
| Interventions (Figure S8, Table S8)              | <ul style="list-style-type: none"> <li>• Those from medical routes were less likely to have an intervention.</li> <li>• People with employment related reasons had 2.52 times higher odds of having an intervention; whereas those with lifestyle or practical reasons had lower odds.</li> <li>• Male were less likely to have an intervention.</li> <li>• Children under 18 were less likely to have an intervention. People aged 40-69 were more likely to have an intervention.</li> <li>• Urban residents had 1.27 times higher odds of having an intervention.</li> <li>• People from less deprived areas were less likely to have an intervention.</li> </ul> | <ul style="list-style-type: none"> <li>• Those from medical routes were more likely to have an intervention.</li> <li>• People with employment and practical reasons had higher odds of having an intervention, lower odds for lifestyle reasons.</li> <li>• No difference by gender.</li> <li>• Children under 18 were more likely to have an intervention. No difference between those aged 40-69 and 30-39.</li> <li>• Urban residents were less likely to have an intervention.</li> <li>• People from less deprived areas were more likely to have an intervention, except for the top three least deprived deciles.</li> </ul> | <ul style="list-style-type: none"> <li>• Those from medical routes were less likely to have an intervention.</li> <li>• People with lifestyle reasons had 2.03 times higher odds of having an intervention, but no difference by employment or practical reasons.</li> <li>• No difference by gender.</li> <li>• Children under 18 were more likely to have an intervention. No difference between those aged 40-69 and 30-39.</li> <li>• Urban residents were less likely to have an intervention.</li> <li>• Limited difference by area deprivation.</li> </ul> |

(a) Gender

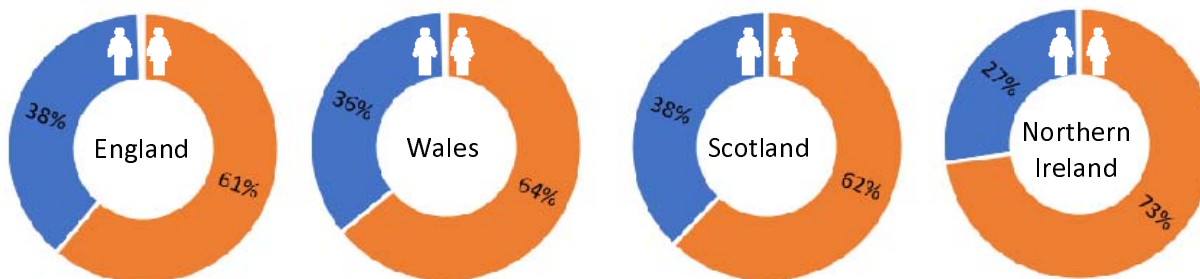

(b) Age groups

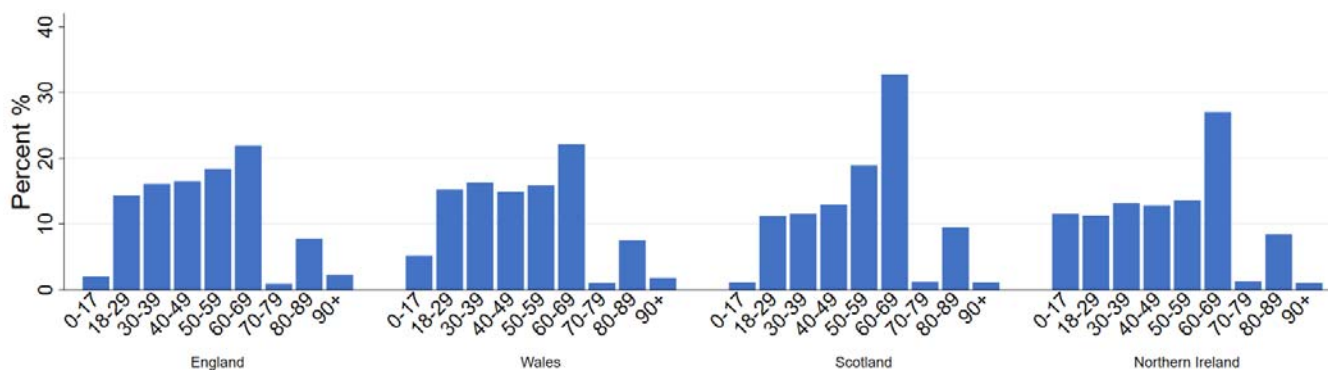

(c) Urbanicity

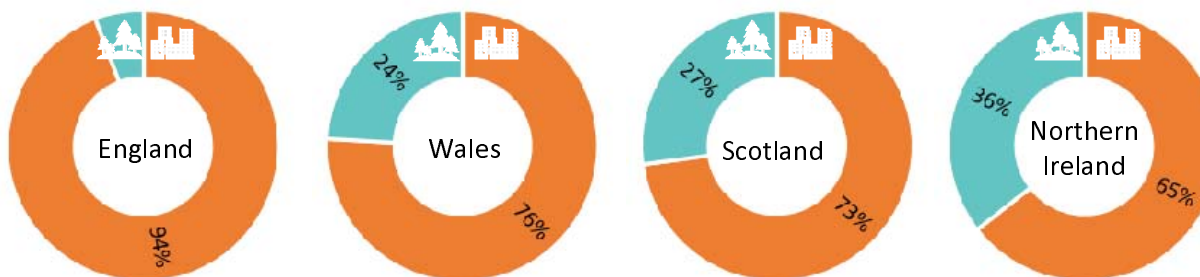

(d) Index of multiple deprivation deciles

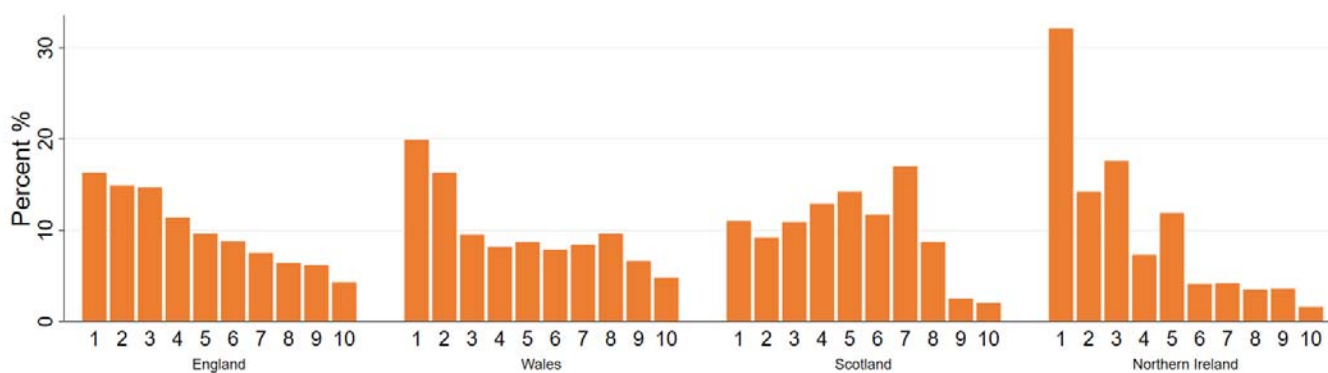

Figure 1 Socio-demographic characteristics of unique individuals by country

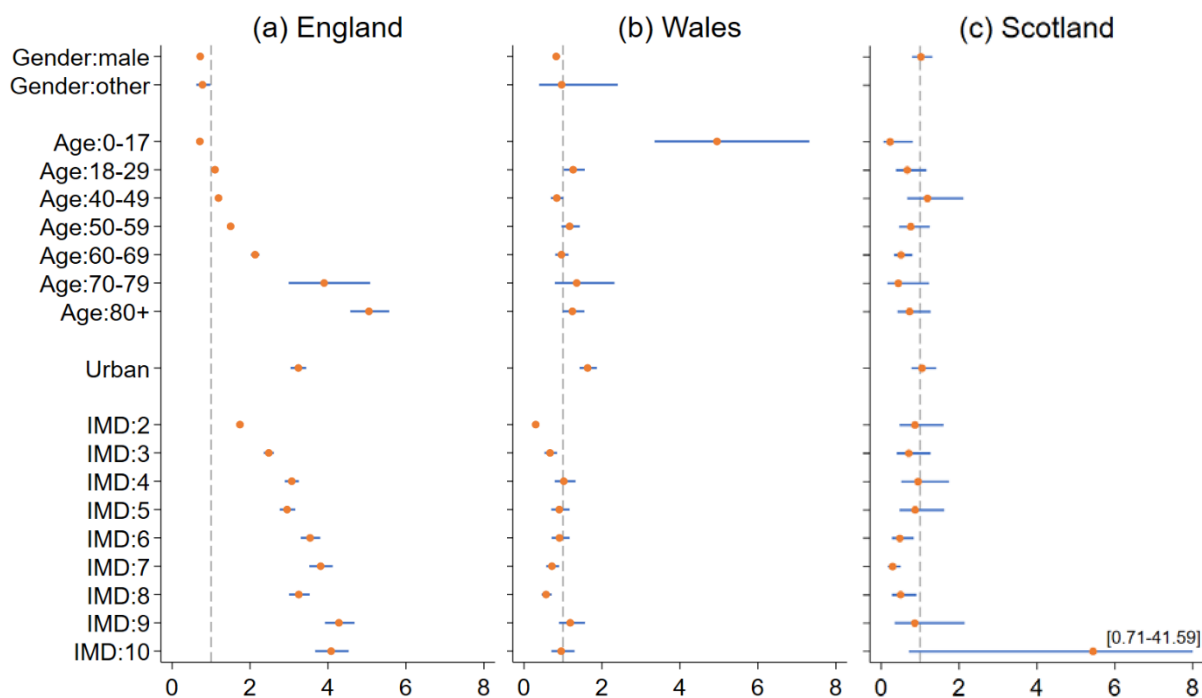

Figure 2 Odds ratios and 95% confidence intervals from the logistic regression model on being referred via medical routes by country

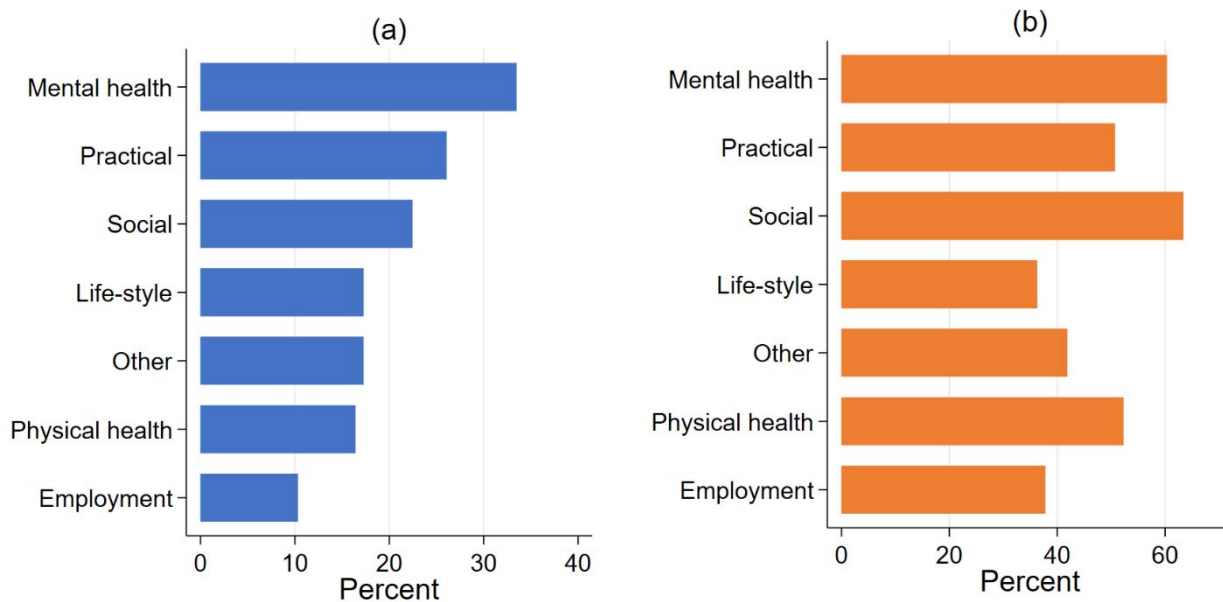

Figure 3 Referral reasons (a) percentage of cases with referral reasons from each domain (b) percentages of cases with reasons from one or more different domain for each domain

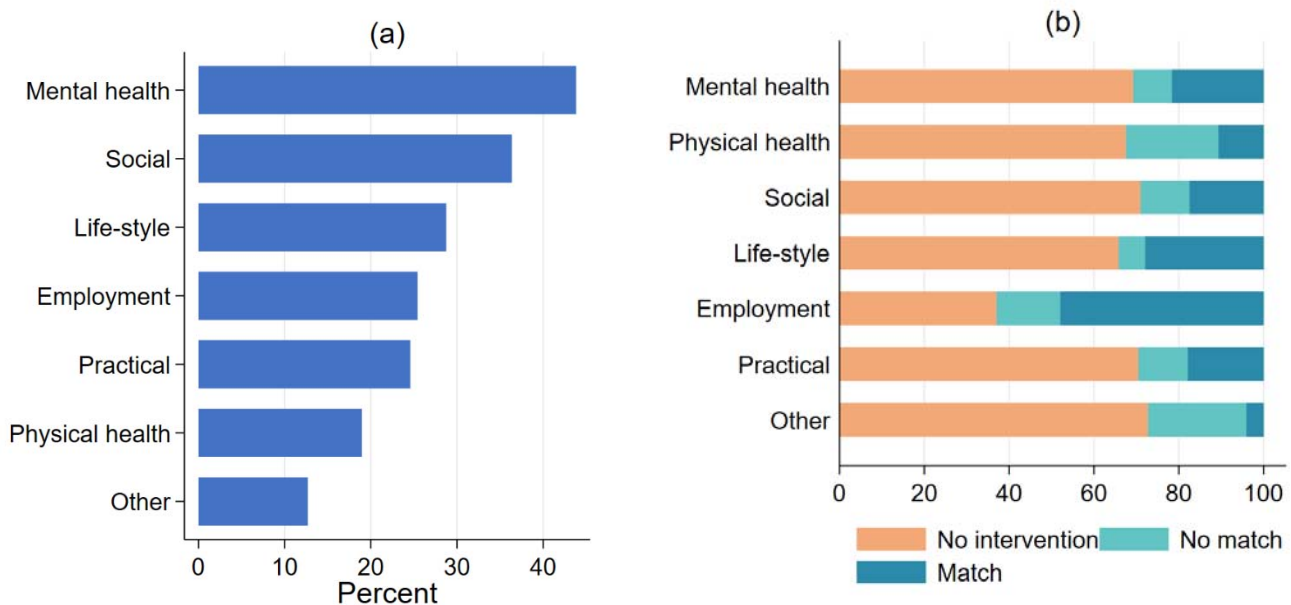

Figure 4 Intervention domains (a) among cases with an intervention, percentage of cases belong to each domain (b) percentages of cases receiving an intervention matched to referral reason in each referral reason domain
